# Supplementary material for: Integrating Genome-Wide Association Study, Transcriptome and Metabolome Reveal Novel QTL and Candidate Genes That Control Protein Content in Soybean
Source: MDPI journal article supplement (doi:10.3390/plants13081128), 2024-04-17
Supplement: s1 [file s1]

**Table S1.** Statistical analysis of protein content in soybean.

| Trait           | Location  | Min(%) | Max(%) | Mean(%) | SD <sup>a</sup> | CV <sup>b</sup> (%) | Heritability |
|-----------------|-----------|--------|--------|---------|-----------------|---------------------|--------------|
| Protein content | Xiangyang | 37.7   | 46.4   | 41.5    | 1.35            | 3.20%               | 0.92         |
|                 | Hulan     | 37.8   | 46.1   | 41.6    | 1.3             | 3.10%               |              |
|                 | Acheng    | 38.2   | 44.9   | 41.7    | 1.29            | 3.10%               |              |

<sup>a</sup> SD: Standard Deviation; <sup>b</sup> CV: Coefficient of Variation;
